# Supplementary material for: Nephro-toxic effects of intraperitoneally injected EGCG in diabetic mice: involvement of oxidative stress, inflammation and apoptosis
Source: PubMed Central journal article supplement (PMC5241811; doi:10.1038/srep40617), 2017-01-18
Supplement: srep40617-s1.pdf [file srep40617-s1.pdf]

*Nephro-toxic effects of intraperitoneally injected EGCG in diabetic mice:*

*involvement of oxidative stress, inflammation and apoptosis*

**Authors:**

**\*Nora Osama Abdel Rasheed<sup>1</sup>, Lamiaa Ahmed Ahmed<sup>2</sup>, Dalaal M. Abdallah<sup>3</sup>, Bahia M. El-Sayeh<sup>4</sup>**

**Corresponding author: Nora Osama Abdel Rasheed<sup>1</sup>**

1. Department of Pharmacology and Toxicology , Faculty of Pharmacy, Cairo University, Egypt.

2. Department of Pharmacology and Toxicology , Faculty of Pharmacy, Cairo University, Egypt.

3. Department of Pharmacology and Toxicology , Faculty of Pharmacy, Cairo University, Egypt.

4. Department of Pharmacology and Toxicology , Faculty of Pharmacy, Cairo University, Egypt.

**Supplementary table 1: Effect of different doses of EGCG (50,100,150 and 200 mg/kg) on percentage of mortality, serum cystatin C.**

|                        | <b>Normal control (saline)</b> | <b>EGCG 50</b> | <b>EGCG100</b> | <b>EGCG150</b> | <b>EGCG200</b>                    |
|------------------------|--------------------------------|----------------|----------------|----------------|-----------------------------------|
| %mortality             | 0%                             | 0%             | 0%             | 40%            | 100%                              |
| Serum cystatin C pg/mL | 33.80±1.463                    | 23.63±0.8715*  | 32.30±0.8602   | 68.33±1.829*   | Not estimated as all animals died |

Each value represents the mean of 5-8 experiments ± S.E.M.

\* Significantly different from normal group at  $P < 0.05$
